# Supplementary material for: Ash pretreatment of pine and biosolids produces biochars with enhanced capacity for organic micropollutant removal from surface water, wastewater, and stormwater
Source: Royal Society of Chemistry journal article supplement (doi:10.1039/c9ew00862d), 2019-12-17
Supplement: c9ew00862d1.pdf [file c9ew00862d1.pdf]

## Supplementary Information

Ash pretreatment of pine and biosolids produces biochars with enhanced capacity for organic micropollutant removal from surface water, wastewater, and stormwater

Matthew J Bentley\*, R Scott Summers

University of Colorado Boulder, Environmental Engineering, 4001 Discovery Drive – 607 UCB,  
Boulder, CO 80309, USA

\* Corresponding Author. Email: matthew.bentley@colorado.edu

### Contents:

|                                                                                                                                                                                                                                                |         |
|------------------------------------------------------------------------------------------------------------------------------------------------------------------------------------------------------------------------------------------------|---------|
| Table S1. Dissolved ash solution characterization.                                                                                                                                                                                             | Page S2 |
| Table S2. Dose to achieve 25% and 75% removal of 2,4-D and SMX for all adsorbents in DI, BEM, WW, and SW after a 7-day contact time.                                                                                                           | Page S2 |
| Figure S1. Kinetic performance of PUB, PAB, and PAC in DI water.                                                                                                                                                                               | Page S3 |
| Figure S2. Dose response curves in DI, BEM, WW, and SW for removal of 2,4-D with all sorbents after a 7-day contact time.                                                                                                                      | Page S3 |
| Figure S3. Micropore, non-micropore, and total surface area vs. dose required for 75% 2,4-D removal in 3-hour BEM.                                                                                                                             | Page S4 |
| Figure S4. Normalized dose required to achieve 75% removal of 2,4-D in BEM (TOC = 4.5 mg/L), WW (TOC = 6.7 mg/L, and SW (TOC = 7.6 mg/l) normalized to that in DI for PAC, PAB, and UPB at 7-day contact time.                                 | Page S4 |
| Figure S5. UVA <sub>254</sub> removal vs. micropollutant removal in a) all background matrices for all biochars, grouped by target compound, and b) PAC and pine biochars grouped by compound and background matrix.                           | Page S5 |
| Figure S6. a) SMX removal normalized to 2,4-D removal in a background matrix normalized to that in DI water. b) Kinetic impacts of 2,4-D and SMX in the presence of background organic matter, and a 1:1 line for reference showing no impact. | Page S5 |

**Table S1** Dissolved ash solution characterization. Only metals exceeding 100 ppb are listed, and all metals are listed in ppb.

| Ash Leachate           | pH | Ba  | Ca     | K       | Mg     | Na   | P    | Si   |
|------------------------|----|-----|--------|---------|--------|------|------|------|
| Pine Ash Solution      | 11 | 140 | 7850   | >50,000 | 43,700 | 1740 | 2200 | 4120 |
| Biosolids Ash Solution | 9  | 233 | 10,100 | 5330    | 8960   | 1190 | 3460 | 2600 |

**Table S2** Dose to achieve 25% and 75% removal of 2,4-D and SMX for all adsorbents in DI, BEM, WW, and SW after a 7-day contact time.

| Compound | Sorbent | DI  |     | BEM  |     | WW  |      | SW   |       |
|----------|---------|-----|-----|------|-----|-----|------|------|-------|
|          |         | 25% | 75% | 25%  | 75% | 25% | 75%  | 25%  | 75%   |
| 2,4-D    | PAC     | 0.3 | 1.8 | 1.0  | 5.8 | 3   | 9    | 6    | 21    |
|          | PAB     | 5.3 | 14  | 4.9  | 20  | 13  | 56   | 32   | 121   |
|          | PAMB    | 4.0 | 23  | 7.5  | 28  | 27  | 81   | 66   | 196   |
|          | PUB     | 64  | 115 | 51   | 177 | 158 | 468  | 368  | 1404  |
|          | BAB-C   | 45  | 183 | 88   | 296 | -   | -    | 636  | 1713  |
|          | BUB     | 63  | 246 | 73   | 366 | 204 | 680  | 1757 | >2000 |
|          | BAB     | 84  | 312 | 87   | 417 | 266 | 1189 | 729  | >2000 |
| SMX      | PAC     | 0.4 | 2.2 | 1.8  | 8.5 | 4   | 19   | 6    | 21    |
|          | PAB     | 6.4 | 17  | 7.4  | 42  | 27  | 88   | 44   | 202   |
|          | PAMB    | 5.5 | 39  | 17.4 | 51  | 37  | >100 | 88   | 232   |
|          | PUB     | 75  | 225 | 141  | 223 | 393 | 1040 | 584  | >2000 |
|          | BAB-C   | 74  | 223 | 137  | 609 | -   | -    | 686  | 1786  |
|          | BUB     | 76  | 329 | 144  | 674 | 435 | 1413 | 1648 | >2000 |
|          | BAB     | 116 | 475 | 255  | 853 | 594 | 2079 | 760  | >2000 |

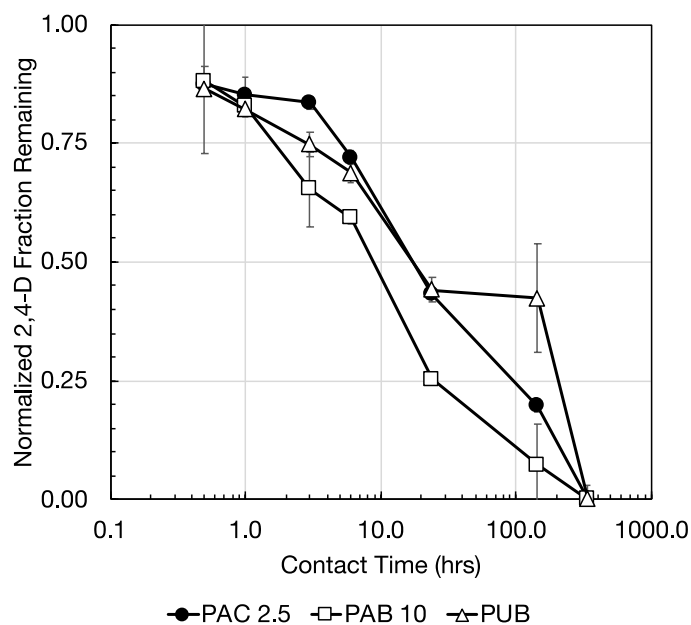

**Figure S1** Kinetic performance, normalized to removal at 14-days, of PUB, PAB, and PAC in DI water. Error bars denote range of two standard deviations.

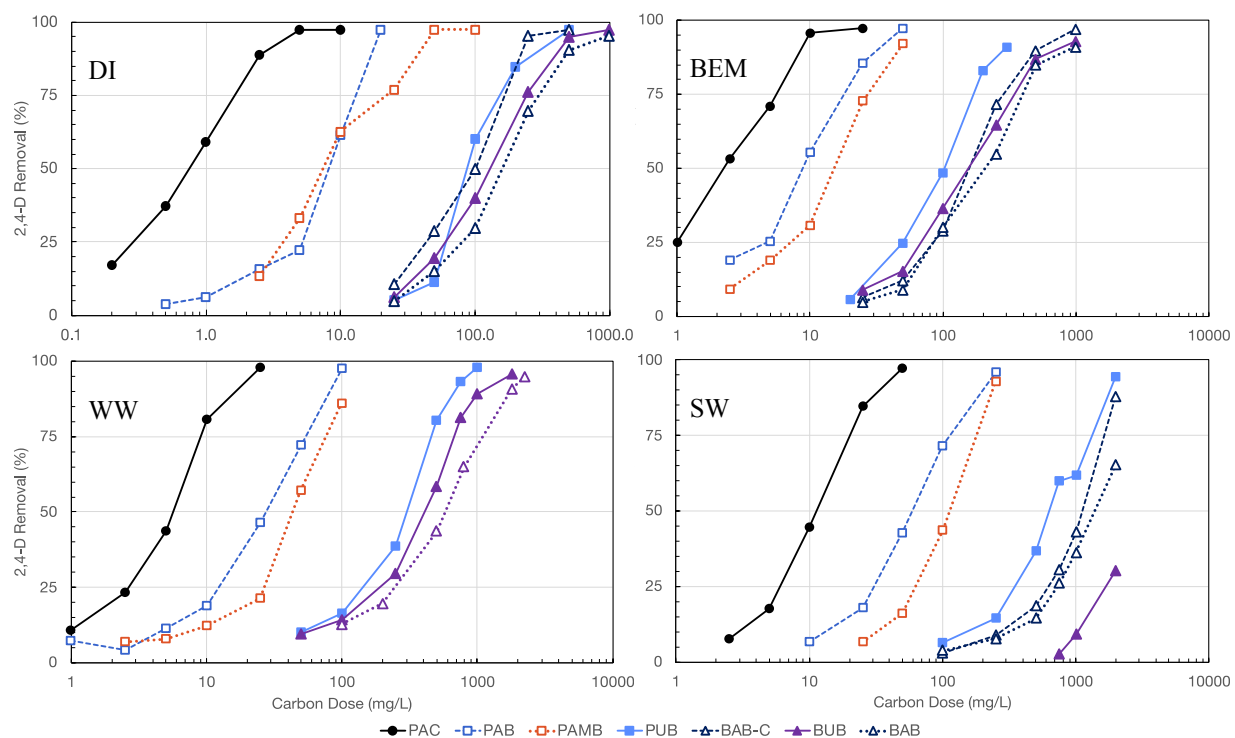

**Figure S2** Dose response curves in DI, BEM, WW, and SW for removal of 2,4-D with all sorbents after a 7-day contact time.

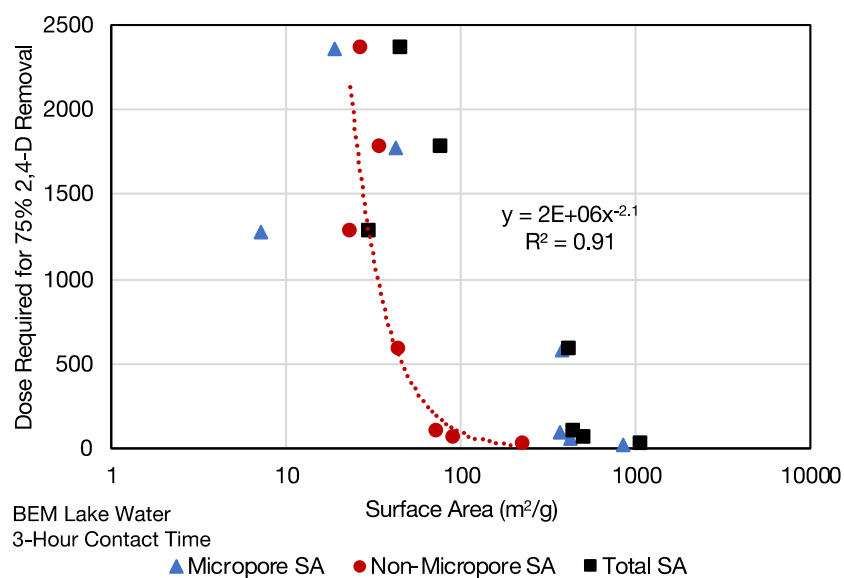

**Figure S3** Micropore, non-micropore, and total surface area vs. dose required for 75% 2,4-D removal in 3-hour BEM. Correlation shown is for non-micropore surface area calculated by the T-Plot method.

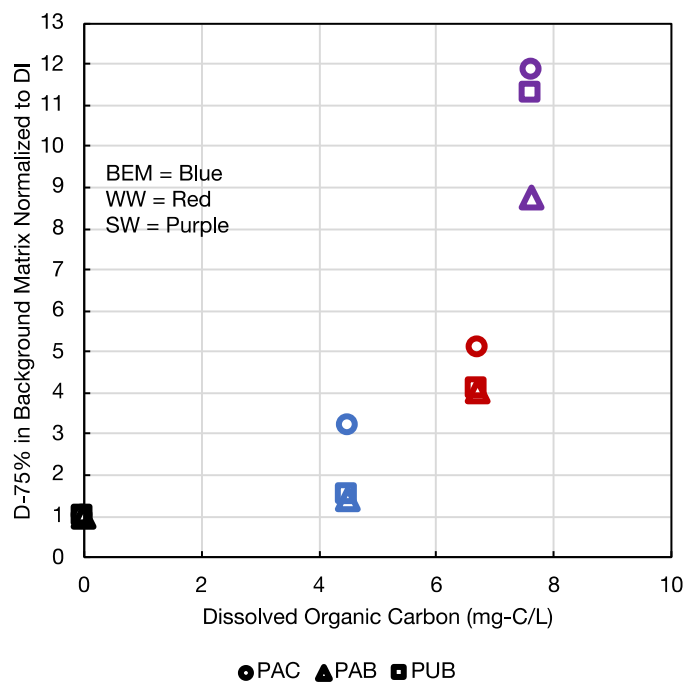

**Figure S4** Normalized dose required to achieve 75% removal (D-75%) of 2,4-D in BEM (DOC = 4.5 mg/L), WW (DOC = 6.7 mg/L, and SW (DOC = 7.6 mg/l) normalized to that in DI for PAC, PAB, and UPB at 7-day contact time.

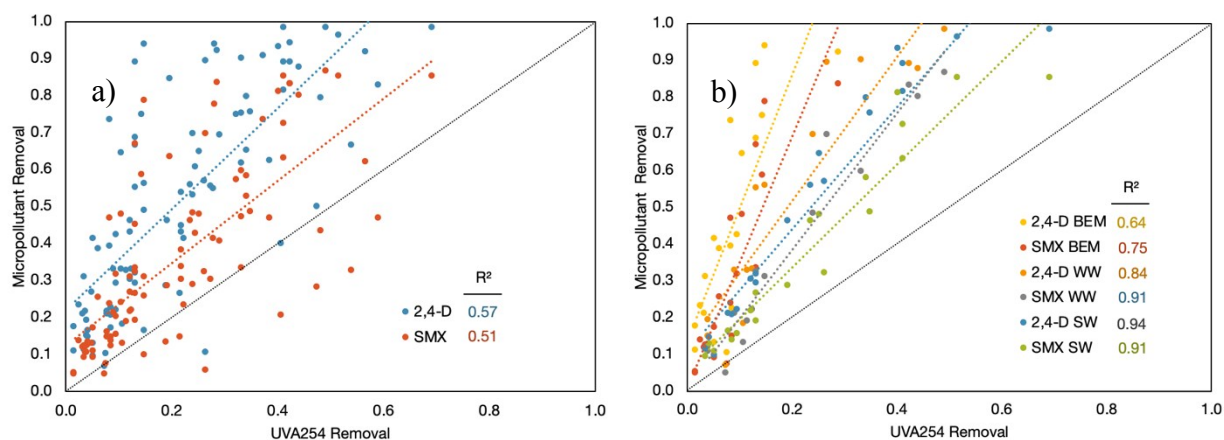

**Figure S5** UVA<sub>254</sub> removal vs. micropollutant removal in a) all background matrices for all biochars, grouped by target compound, and b) PAC and pine biochars (no biosolids biochars) grouped by compound and background matrix. The black dotted line depicts a 1:1 correlation.

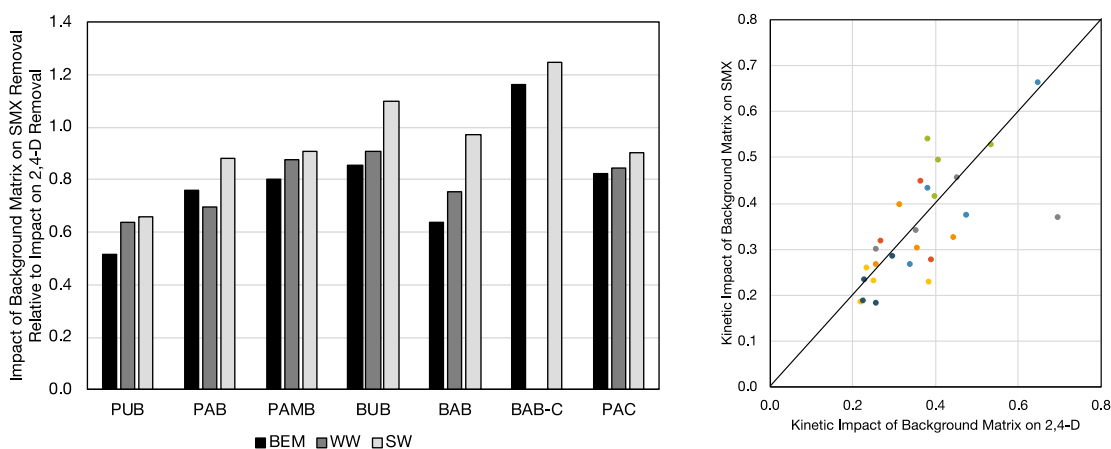

**Figure S6** a) Impact of the background matrix on SMX removal relative to 2,4-D removal. Values below 1.0 indicate that background matrix affected SMX more than 2,4-D. b) Kinetic impacts of 2,4-D and SMX in the presence of background organic matter, and a 1:1 line corresponding to no compound-specific impact from the background matrix on sorption kinetics.
